# Supplementary material
Source: PubMed Central journal article supplement (PMC5321027)
Supplement: pnas.1700231114.sd01.pdf [file pnas.1700231114.sd01.pdf]

## Dataset S1

*Specific genes for NKG2D\_4h stimulation:*

| <b>Ensembl ID</b> | <b>Gene symbol</b>       | <b>Fold change<br/>(NKG2D_4h)</b> | <b>p-value<br/>(NKG2D_4h)</b> |
|-------------------|--------------------------|-----------------------------------|-------------------------------|
| ENSG00000262304   | TRPV1 (ion channel)      | 2.87                              | 0.00197                       |
| ENSG00000251279   | CTC-436P18.1 (unknown)   | 2.77                              | 0.0136                        |
| ENSG00000179256   | SMCO3 (membrane protein) | 1.82                              | 0.0317                        |
| ENSG00000206989   | SNORD63 (ncRNA)          | 1.75                              | 0.00254                       |

*Specific genes for KIR2DS1\_4h stimulation:*

| <b>Ensembl ID</b> | <b>Gene symbol</b> | <b>Fold change<br/>(KIR2DS1_4h)</b> | <b>p-value<br/>(KIR2DS1_4h)</b> |
|-------------------|--------------------|-------------------------------------|---------------------------------|
| ENSG00000185433   | LINC00158          | 2.88                                | 6.62E-14                        |
| ENSG00000112182   | BACH2              | 2.71                                | 0.0064                          |
| ENSG00000126010   | GRPR               | 2.57                                | 0.0316                          |
| ENSG00000179059   | ZFP42              | 2.53                                | 0.004                           |
| ENSG00000166292   | TMEM100            | 2.46                                | 5.69E-7                         |
| ENSG00000175866   | BAIAP2             | 2.38                                | 0.0198                          |
| ENSG00000140511   | HAPLN3             | 2.32                                | 0.0207                          |
| ENSG00000115594   | IL1R1              | 2.19                                | 4.41E-14                        |
| ENSG00000008283   | CYB561             | 2.07                                | 5.08E-21                        |
| ENSG00000154479   | CCDC173            | 2.03                                | 0.00251                         |
| ENSG00000256128   | LINC00944          | 2.00                                | 0.0155                          |
| ENSG00000160789   | LMNA               | 2.00                                | 5.51E-7                         |
| ENSG00000130396   | MLLT4              | 1.96                                | 0.019                           |
| ENSG00000080618   | CPB2               | 1.93                                | 0.0113                          |
| ENSG00000251230   | LOC731424          | 1.88                                | 0.00303                         |
| ENSG00000189190   | ZNF600             | 1.88                                | 0.00251                         |
| ENSG00000182568   | SATB1              | 1.77                                | 9.29E-4                         |
| ENSG00000080823   | MOK                | 1.76                                | 3.6E-12                         |
| ENSG00000128965   | CHAC1              | 1.74                                | 2.31E-14                        |
| ENSG00000111837   | MAK                | 1.71                                | 2.85E-13                        |
| ENSG00000164683   | HEY1               | 1.69                                | 8.3E-5                          |
| ENSG00000150347   | ARID5B             | 1.69                                | 3.66E-55                        |
| ENSG00000121594   | CD80               | 1.68                                | 3.1E-33                         |
| ENSG00000250295   | LOC101926926       | 1.64                                | 0.0156                          |
| ENSG00000169248   | CXCL11             | 1.59                                | 0.0114                          |
| ENSG00000167703   | SLC43A2            | 1.59                                | 5.2E-10                         |
| ENSG00000100583   | SAMD15             | 1.59                                | 1.04E-4                         |
| ENSG00000105499   | PLA2G4C            | 1.56                                | 0.0125                          |
| ENSG00000118495   | PLAGL1             | 1.55                                | 3.24E-10                        |
| ENSG00000225439   | BOLA3-AS1          | 1.55                                | 0.014                           |
| ENSG00000137216   | TMEM63B            | 1.55                                | 8.56E-28                        |
| ENSG00000106089   | STX1A              | 1.54                                | 1.87E-11                        |
| ENSG00000104998   | IL27RA             | 1.53                                | 4.91E-29                        |
| ENSG00000081985   | IL12RB2            | 1.50                                | 2.68E-38                        |
| ENSG00000136158   | SPRY2              | 1.50                                | 0.0235                          |
| ENSG00000168016   | TRANK1             | -1.50                               | 3.6E-7                          |
| ENSG00000091592   | NLRP1              | -1.50                               | 2.32E-6                         |
| ENSG00000177674   | AGTRAP             | -1.51                               | 0.00775                         |
| ENSG00000241316   | SUCLG2-AS1         | -1.52                               | 0.0389                          |
| ENSG00000145246   | ATP10D             | -1.53                               | 1.15E-7                         |
| ENSG00000136531   | SCN2A              | -1.53                               | 0.0462                          |
| ENSG00000182257   | PRR34              | -1.54                               | 0.0166                          |
| ENSG00000183682   | BMP8A              | -1.66                               | 0.0199                          |
| ENSG00000162739   | SLAMF6             | -1.66                               | 2.25E-6                         |
| ENSG00000198796   | ALPK2              | -1.68                               | 0.0104                          |
| ENSG00000135063   | FAM189A2           | -1.72                               | 2.24E-4                         |
| ENSG00000174600   | CMKLR1             | -1.73                               | 1.64E-6                         |
| ENSG00000112812   | PRSS16             | -1.80                               | 0.00387                         |
| ENSG00000006468   | ETV1               | -1.85                               | 0.0107                          |
| ENSG00000170858   | LILRP2             | -1.86                               | 1.62E-9                         |
| ENSG00000173269   | MMRN2              | -1.90                               | 0.0417                          |
| ENSG00000129422   | MTUS1              | -1.96                               | 0.0166                          |
| ENSG00000188869   | TMC3               | -2.11                               | 0.037                           |
| ENSG00000137831   | UACA               | -2.27                               | 2.83E-12                        |
| ENSG00000205821   | LOC284009          | -2.43                               | 0.00594                         |
| ENSG00000181903   | OR4C6              | -2.49                               | 3.88E-4                         |
| ENSG00000110169   | HPX                | -2.53                               | 0.0386                          |

|                 |           |       |         |
|-----------------|-----------|-------|---------|
| ENSG00000212658 | KRTAP29-1 | -3.13 | 0.0407  |
| ENSG00000114993 | RTKN      | -5.12 | 0.0485  |
| ENSG00000234906 | APOC2     | -5.27 | 0.0262  |
| ENSG00000118473 | SGIP1     | -5.99 | 3.41E-4 |

*Specific genes for Ly49H\_4h stimulation:*

| <b>Ensembl ID</b> | <b>Gene symbol</b> | <b>Fold change<br/>(Ly49H_4h)</b> | <b>p-value<br/>(Ly49H_4h)</b> |
|-------------------|--------------------|-----------------------------------|-------------------------------|
| ENSG00000102962   | CCL22              | 6.45                              | 7.31E-9                       |
| ENSG00000166670   | MMP10              | 6.45                              | 7.31E-9                       |
| ENSG00000126549   | STATH              | 6.18                              | 4.3E-18                       |
| ENSG00000115009   | CCL20              | 6.10                              | 3.3E-7                        |
| ENSG00000169194   | IL13               | 5.79                              | 9.98E-18                      |
| ENSG00000126259   | KIRREL2            | 5.75                              | 1.1E-12                       |
| ENSG00000138798   | EGF                | 5.69                              | 2.44E-5                       |
| ENSG00000197632   | SERPINB2           | 5.47                              | 3.49E-8                       |
| ENSG00000136695   | IL36RN             | 4.95                              | 0.0047                        |
| ENSG00000254997   | KRTAP5-9           | 4.95                              | 0.0047                        |
| ENSG00000149256   | TENM4              | 4.95                              | 0.0047                        |
| ENSG00000188800   | TMCO2              | 4.84                              | 0.0303                        |
| ENSG00000262202   | SNORD3D            | 4.73                              | 0.0124                        |
| ENSG00000168348   | INSM2              | 4.62                              | 3.39E-5                       |
| ENSG00000260151   | LOC101929180       | 4.51                              | 0.0477                        |
| ENSG00000224675   | LOC100144595       | 4.47                              | 0.0344                        |
| ENSG00000162892   | IL24               | 4.14                              | 6.36E-11                      |
| ENSG00000251191   | LINC00589          | 4.09                              | 0.00312                       |
| ENSG00000157680   | DGKI               | 4.05                              | 1.59E-6                       |
| ENSG00000233397   | LOC100506077       | 3.95                              | 0.00528                       |
| ENSG00000222040   | ADRA2B             | 3.92                              | 0.00752                       |
| ENSG00000141574   | SECTM1             | 3.91                              | 0.00754                       |
| ENSG00000102024   | PLS3               | 3.81                              | 2.83E-5                       |
| ENSG00000075891   | PAX2               | 3.72                              | 0.0205                        |
| ENSG00000131203   | IDO1               | 3.7                               | 0.0283                        |
| ENSG00000072682   | P4HA2              | 3.52                              | 0.0476                        |
| ENSG00000237330   | RNF223             | 3.49                              | 0.0481                        |
| ENSG00000253102   | LRRC59             | 3.48                              | 0.00983                       |
| ENSG00000140538   | NTRK3              | 3.43                              | 0.00887                       |
| ENSG00000234336   | JAZF1-AS1          | 3.32                              | 3.54E-7                       |
| ENSG00000205863   | C1QTNF9B           | 3.27                              | 0.0217                        |
| ENSG00000258946   | LOC100506446       | 3.18                              | 0.00106                       |
| ENSG00000175003   | SLC22A1            | 3.18                              | 0.00104                       |
| ENSG00000060558   | GNA15              | 3.02                              | 0.00116                       |
| ENSG00000261671   | LOC100130992       | 3.01                              | 0.0126                        |
| ENSG00000243004   | LOC101927668       | 2.83                              | 8.54E-5                       |
| ENSG00000173451   | THAP2              | 2.77                              | 1.79E-27                      |
| ENSG00000139572   | GPR84              | 2.76                              | 0.00379                       |
| ENSG00000257242   | C12orf79           | 2.74                              | 0.000744                      |
| ENSG00000162510   | MATN1              | 2.71                              | 5.74E-13                      |
| ENSG00000140287   | HDC                | 2.71                              | 3.26E-25                      |
| ENSG00000226396   | RPS14P3            | 2.69                              | 4.57E-7                       |
| ENSG00000203837   | PNLIPRP3           | 2.61                              | 0.0322                        |
| ENSG00000041982   | TNC                | 2.61                              | 1.6E-36                       |
| ENSG00000153093   | ACOXL              | 2.58                              | 0.00344                       |
| ENSG00000161270   | NPHS1              | 2.56                              | 1.47E-4                       |
| ENSG00000188783   | PRELP              | 2.53                              | 0.0195                        |
| ENSG00000131711   | MAP1B              | 2.52                              | 0.0383                        |
| ENSG00000214900   | C14orf182          | 2.5                               | 2.23E-20                      |
| ENSG00000186652   | PRG2               | 2.48                              | 0.00601                       |
| ENSG00000115956   | PLEK               | 2.48                              | 2.61E-44                      |
| ENSG00000141316   | SPACA3             | 2.45                              | 4.32E-12                      |
| ENSG00000156127   | BATF               | 2.41                              | 1.94E-22                      |
| ENSG00000136634   | IL10               | 2.4                               | 6.47E-17                      |
| ENSG00000222041   | LINC00152          | 2.39                              | 2.7E-18                       |
| ENSG00000265452   | MIR3682            | 2.36                              | 5.44E-6                       |
| ENSG00000243795   | LOC101929717       | 2.35                              | 0.0307                        |
| ENSG00000221955   | SLC12A8            | 2.34                              | 0.0296                        |
| ENSG00000248334   | WHAMMP2            | 2.33                              | 9.0E-17                       |
| ENSG00000117090   | SLAMF1             | 2.33                              | 4.66E-33                      |
| ENSG00000261105   | LMO7-AS1           | 2.31                              | 2.42E-4                       |
| ENSG00000197249   | SERPINA1           | 2.29                              | 0.00162                       |
| ENSG00000067177   | PHKA1              | 2.25                              | 1.12E-4                       |

|                 |                          |      |          |
|-----------------|--------------------------|------|----------|
| ENSG00000226009 | KCNIP2-AS1               | 2.25 | 2.46E-5  |
| ENSG00000212607 | SNORA45B                 | 2.25 | 4.32E-7  |
| ENSG00000232533 | LOC100507507             | 2.22 | 2.56E-15 |
| ENSG00000175592 | FOSL1                    | 2.21 | 5.69E-21 |
| ENSG00000260372 | AQP4-AS1                 | 2.2  | 0.00773  |
| ENSG00000174500 | GCSAM                    | 2.18 | 0.0238   |
| ENSG00000186827 | TNFRSF4                  | 2.18 | 2.05E-12 |
| ENSG00000258586 | LOC100506498             | 2.17 | 2.44E-6  |
| ENSG00000178690 | DYNAP                    | 2.16 | 0.00657  |
| ENSG00000231105 | LOC100506801             | 2.15 | 2.77E-5  |
| ENSG00000196843 | ARID5A                   | 2.14 | 1.41E-11 |
| ENSG00000106537 | TSPAN13                  | 2.13 | 5.84E-4  |
| ENSG00000230641 | USP12-AS2                | 2.11 | 0.00608  |
| ENSG00000196436 | NPIP15 (includes others) | 2.09 | 1.6E-8   |
| ENSG00000234263 | LOC101928461             | 2.07 | 0.0357   |
| ENSG00000229891 | LINC01315                | 2.07 | 0.00361  |
| ENSG00000172965 | MIR4435-1HG              | 2.07 | 6.25E-13 |
| ENSG00000133639 | BTG1                     | 2.07 | 4.02E-35 |
| ENSG00000266040 | LOC101929533             | 2.06 | 0.0253   |
| ENSG00000169413 | RNASE6                   | 2.06 | 0.00379  |
| ENSG00000102265 | TIMP1                    | 2.06 | 2.01E-15 |
| ENSG00000248099 | INSL3                    | 2.04 | 7.05E-4  |
| ENSG00000111729 | CLEC4A                   | 2.04 | 1.27E-4  |
| ENSG00000182368 | FAM27C                   | 2.03 | 0.00213  |
| ENSG00000145777 | TSLP                     | 2.03 | 4.07E-6  |
| ENSG00000236719 | OVAAL                    | 2.03 | 4.14E-7  |
| ENSG00000137648 | TMPRSS4                  | 2.02 | 0.00165  |
| ENSG00000187984 | ANKRD19P                 | 2.02 | 2.07E-4  |
| ENSG00000172183 | ISG20                    | 1.96 | 2.07E-8  |
| ENSG00000122862 | SRGN                     | 1.96 | 8.34E-30 |
| ENSG00000168878 | SFTPB                    | 1.94 | 0.0197   |
| ENSG00000185507 | IRF7                     | 1.94 | 3.19E-23 |
| ENSG00000100450 | GZMH                     | 1.93 | 1.87E-4  |
| ENSG00000229056 | LOC101927482             | 1.93 | 6.2E-8   |
| ENSG00000131015 | ULBP2                    | 1.93 | 5.72E-28 |
| ENSG00000143153 | ATP1B1                   | 1.92 | 2.08E-6  |
| ENSG00000161912 | ADCY10P1                 | 1.92 | 1.49E-6  |
| ENSG00000100292 | HMOX1                    | 1.92 | 5.1E-7   |
| ENSG00000186132 | C2orf76                  | 1.92 | 4.92E-16 |
| ENSG00000060642 | PIGV                     | 1.91 | 2.98E-21 |
| ENSG00000267532 | MIR497HG                 | 1.89 | 7.6E-4   |
| ENSG00000207501 | RNVU1-14                 | 1.89 | 1.69E-4  |
| ENSG00000116285 | ERRFI1                   | 1.88 | 0.0357   |
| ENSG00000255198 | SNHG9                    | 1.88 | 4.18E-7  |
| ENSG00000161326 | DUSP14                   | 1.88 | 1.03E-17 |
| ENSG00000116717 | GADD45A                  | 1.88 | 5.28E-35 |
| ENSG00000171522 | PTGER4                   | 1.88 | 2.01E-36 |
| ENSG00000100276 | RASL10A                  | 1.87 | 0.00411  |
| ENSG00000196329 | GIMAP5                   | 1.87 | 1.04E-9  |
| ENSG00000257704 | INAFM1                   | 1.86 | 9.0E-9   |
| ENSG00000196569 | LAMA2                    | 1.85 | 7.67E-5  |
| ENSG00000107968 | MAP3K8                   | 1.85 | 3.37E-24 |
| ENSG00000137575 | SDCBP                    | 1.85 | 2.02E-39 |
| ENSG00000155428 | TRIM73/TRIM74            | 1.84 | 0.029    |
| ENSG00000207205 | RNVU1-15                 | 1.82 | 0.0184   |
| ENSG00000207166 | SNORA68                  | 1.82 | 4.73E-5  |
| ENSG00000173812 | EIF1                     | 1.82 | 7.19E-21 |
| ENSG00000234618 | RPSAP9                   | 1.81 | 1.97E-7  |
| ENSG00000267226 | LOC101927322             | 1.80 | 0.00238  |
| ENSG00000185499 | MUC1                     | 1.80 | 4.8E-11  |
| ENSG00000228486 | LINC01125                | 1.79 | 5.07E-10 |
| ENSG00000181773 | GPR3                     | 1.79 | 1.05E-12 |
| ENSG00000136560 | TANK                     | 1.79 | 4.46E-24 |
| ENSG00000169246 | NPIP14 (includes others) | 1.78 | 2.8E-7   |
| ENSG00000160888 | IER2                     | 1.78 | 3.74E-21 |
| ENSG00000164850 | GPER1                    | 1.77 | 0.00587  |
| ENSG00000136205 | TNS3                     | 1.77 | 0.00128  |
| ENSG00000237541 | HLA-DQA2                 | 1.77 | 1.07E-5  |
| ENSG00000173846 | PLK3                     | 1.77 | 1.13E-20 |
| ENSG00000224420 | ADM5                     | 1.76 | 5.0E-8   |
| ENSG00000166401 | SERPINB8                 | 1.76 | 3.68E-11 |

|                 |              |       |          |
|-----------------|--------------|-------|----------|
| ENSG00000186010 | NDUFA13      | 1.75  | 5.85E-8  |
| ENSG00000027869 | SH2D2A       | 1.75  | 1.32E-12 |
| ENSG00000121039 | RDH10        | 1.75  | 3.11E-33 |
| ENSG00000142227 | EMP3         | 1.72  | 1.59E-12 |
| ENSG00000257027 | LOC101928054 | 1.71  | 4.27E-17 |
| ENSG00000118785 | SPP1         | 1.71  | 2.76E-19 |
| ENSG00000103642 | LACTB        | 1.71  | 1.31E-23 |
| ENSG00000145365 | TIFA         | 1.71  | 7.16E-24 |
| ENSG00000240567 | LOC101243545 | 1.70  | 5.09E-5  |
| ENSG00000227373 | LOC102724601 | 1.69  | 0.00601  |
| ENSG00000172653 | HEATR9       | 1.68  | 1.45E-4  |
| ENSG00000102096 | PIM2         | 1.66  | 3.69E-15 |
| ENSG00000099985 | OSM          | 1.66  | 3.46E-25 |
| ENSG00000151715 | TMEM45B      | 1.64  | 0.00339  |
| ENSG00000221539 | SNORD99      | 1.64  | 2.32E-4  |
| ENSG00000187944 | C2orf66      | 1.63  | 5.12E-7  |
| ENSG00000230055 | CISD3        | 1.63  | 1.39E-8  |
| ENSG00000177105 | RHOG         | 1.63  | 4.03E-16 |
| ENSG00000214435 | AS3MT        | 1.62  | 0.00243  |
| ENSG00000171159 | C9orf16      | 1.62  | 1.09E-6  |
| ENSG00000125462 | C1orf61      | 1.62  | 3.04E-8  |
| ENSG00000151929 | BAG3         | 1.62  | 1.64E-13 |
| ENSG00000140830 | TXNL4B       | 1.62  | 1.48E-13 |
| ENSG00000115919 | KYNU         | 1.62  | 7.41E-14 |
| ENSG00000135740 | SLC9A5       | 1.62  | 2.74E-16 |
| ENSG00000242252 | BGLAP        | 1.61  | 0.00949  |
| ENSG00000187990 | HIST1H2BG    | 1.61  | 0.00367  |
| ENSG00000110944 | IL23A        | 1.61  | 1.07E-5  |
| ENSG00000107738 | C10orf54     | 1.61  | 8.72E-9  |
| ENSG00000141682 | PMAIP1       | 1.61  | 7.56E-24 |
| ENSG00000220749 | RPL21P28     | 1.60  | 0.00119  |
| ENSG00000253276 | CCDC71L      | 1.60  | 4.14E-7  |
| ENSG00000103257 | SLC7A5       | 1.60  | 9.75E-22 |
| ENSG00000221916 | C19orf73     | 1.59  | 0.0161   |
| ENSG00000137869 | CYP19A1      | 1.59  | 0.00358  |
| ENSG00000102393 | GLA          | 1.59  | 1.09E-11 |
| ENSG00000260583 | LINC00515    | 1.58  | 0.0244   |
| ENSG00000107175 | CREB3        | 1.58  | 3.65E-11 |
| ENSG00000104064 | GABPB1       | 1.58  | 9.22E-25 |
| ENSG00000184260 | HIST2H2AC    | 1.57  | 0.0247   |
| ENSG00000127666 | TICAM1       | 1.57  | 1.89E-12 |
| ENSG00000184203 | PPP1R2       | 1.57  | 4.6E-14  |
| ENSG00000176635 | HORMAD2      | 1.56  | 0.00825  |
| ENSG00000243449 | C4orf48      | 1.56  | 0.00049  |
| ENSG00000158050 | DUSP2        | 1.56  | 2.66E-18 |
| ENSG00000186891 | TNFRSF18     | 1.55  | 0.00222  |
| ENSG00000237181 | LOC101926963 | 1.55  | 2.56E-8  |
| ENSG00000018280 | SLC11A1      | 1.54  | 1.01E-4  |
| ENSG00000177700 | POLR2L       | 1.54  | 1.07E-5  |
| ENSG00000237819 | LOC101927497 | 1.54  | 1.88E-7  |
| ENSG00000176845 | METRNL       | 1.54  | 4.72E-15 |
| ENSG00000091879 | ANGPT2       | 1.53  | 0.0335   |
| ENSG00000214401 | KANSL1-AS1   | 1.53  | 1.16E-6  |
| ENSG00000166866 | MYO1A        | 1.52  | 0.0139   |
| ENSG00000204832 | ST8SIA6-AS1  | 1.52  | 0.00323  |
| ENSG00000143443 | C1orf56      | 1.52  | 6.11E-4  |
| ENSG00000108639 | SYNGR2       | 1.52  | 6.11E-17 |
| ENSG00000105472 | CLEC11A      | 1.51  | 7.41E-4  |
| ENSG00000173559 | NABP1        | 1.51  | 1.39E-15 |
| ENSG00000120129 | DUSP1        | 1.51  | 2.41E-17 |
| ENSG00000204386 | NEU1         | 1.50  | 8.22E-16 |
| ENSG00000126860 | EVI2A        | 1.50  | 8.8E-21  |
| ENSG00000168884 | TNIP2        | 1.50  | 5.05E-25 |
| ENSG00000181408 | UTS2R        | -1.50 | 0.0171   |
| ENSG00000113810 | SMC4         | -1.51 | 5.38E-4  |
| ENSG00000076555 | ACACB        | -1.51 | 1.68E-5  |
| ENSG00000183542 | KLRC4        | -1.51 | 7.93E-8  |
| ENSG00000183508 | FAM46C       | -1.51 | 4.89E-15 |
| ENSG00000263408 | MIR4453      | -1.52 | 0.0439   |
| ENSG00000246859 | STARD4-AS1   | -1.52 | 0.0168   |
| ENSG00000089505 | CMTM1        | -1.52 | 0.00228  |

|                 |               |       |          |
|-----------------|---------------|-------|----------|
| ENSG00000183625 | CCR3          | -1.52 | 1.33E-6  |
| ENSG00000237004 | ZNRF2P1       | -1.53 | 4.08E-4  |
| ENSG00000205790 | DPP9-AS1      | -1.53 | 2.41E-5  |
| ENSG00000076641 | PAG1          | -1.53 | 4.02E-6  |
| ENSG00000111859 | NEDD9         | -1.53 | 4.11E-14 |
| ENSG00000172888 | ZNF621        | -1.54 | 0.00698  |
| ENSG00000074855 | ANO8          | -1.54 | 2.9E-4   |
| ENSG00000127533 | F2RL3         | -1.54 | 3.76E-6  |
| ENSG00000226121 | AHCTF1P1      | -1.55 | 0.0174   |
| ENSG00000136925 | TSTD2         | -1.55 | 0.00215  |
| ENSG00000140632 | GLYR1         | -1.55 | 0.00131  |
| ENSG00000254369 | HOXA-AS3      | -1.56 | 0.00666  |
| ENSG00000243708 | PLA2G4B       | -1.56 | 0.00246  |
| ENSG00000229152 | ANKRD10-IT1   | -1.57 | 0.0289   |
| ENSG00000196110 | ZNF699        | -1.57 | 0.00302  |
| ENSG00000204131 | NHSL2         | -1.59 | 0.00766  |
| ENSG00000235373 | LOC100134822  | -1.60 | 0.0249   |
| ENSG00000066230 | SLC9A3        | -1.60 | 0.0248   |
| ENSG00000174111 | SOCS7         | -1.60 | 7.71E-6  |
| ENSG00000228544 | CCDC183-AS1   | -1.60 | 4.69E-6  |
| ENSG00000229325 | ACAP2-IT1     | -1.61 | 0.0494   |
| ENSG00000095539 | SEMA4G        | -1.61 | 0.00258  |
| ENSG00000260852 | FBXL19-AS1    | -1.62 | 8.94E-6  |
| ENSG00000156650 | KAT6B         | -1.62 | 3.99E-8  |
| ENSG00000162337 | LRP5          | -1.64 | 0.0119   |
| ENSG00000110395 | CBL           | -1.64 | 7.64E-4  |
| ENSG00000149503 | INCENP        | -1.64 | 2.97E-6  |
| ENSG00000197933 | ZNF823        | -1.65 | 0.0235   |
| ENSG00000245648 | LOC101928100  | -1.65 | 0.00203  |
| ENSG00000162591 | MEGF6         | -1.65 | 7.7E-8   |
| ENSG00000165475 | CRYL1         | -1.66 | 0.00169  |
| ENSG00000258659 | TRIM34        | -1.67 | 1.54E-4  |
| ENSG00000054793 | ATP9A         | -1.67 | 5.84E-6  |
| ENSG00000225373 | WASH5P        | -1.68 | 2.59E-4  |
| ENSG00000213204 | C6orf165      | -1.69 | 0.0335   |
| ENSG00000181523 | SGSH          | -1.69 | 0.00407  |
| ENSG00000205047 | KLHDC4        | -1.69 | 3.99E-6  |
| ENSG00000164080 | RAD54L2       | -1.70 | 0.0131   |
| ENSG00000171282 | BAHCC1        | -1.70 | 1.95E-6  |
| ENSG00000248092 | NNT-AS1       | -1.71 | 8.59E-7  |
| ENSG00000185453 | C19orf68      | -1.71 | 3.44E-8  |
| ENSG00000240970 | RPL23AP64     | -1.72 | 0.00428  |
| ENSG00000167377 | ZNF23         | -1.72 | 0.00209  |
| ENSG00000168970 | JMJD7-PLA2G4B | -1.72 | 4.65E-4  |
| ENSG00000126895 | AVPR2         | -1.73 | 0.00119  |
| ENSG00000204366 | ZBTB12        | -1.73 | 1.82E-8  |
| ENSG00000166359 | WDR88         | -1.74 | 3.67E-4  |
| ENSG00000169047 | IRS1          | -1.74 | 2.39E-6  |
| ENSG00000231711 | LINC00899     | -1.74 | 2.71E-8  |
| ENSG00000185278 | ZBTB37        | -1.75 | 5.24E-7  |
| ENSG00000092421 | SEMA6A        | -1.76 | 0.05     |
| ENSG00000265806 | MIR4292       | -1.77 | 0.00477  |
| ENSG00000232803 | SLCO4A1-AS1   | -1.77 | 0.00267  |
| ENSG00000205746 | LOC101060429  | -1.77 | 0.00131  |
| ENSG00000180539 | C9orf139      | -1.77 | 6.2E-10  |
| ENSG00000156475 | PPP2R2B       | -1.78 | 0.0218   |
| ENSG00000160293 | VAV2          | -1.78 | 4.53E-4  |
| ENSG00000163823 | CCR1          | -1.78 | 2.25E-7  |
| ENSG00000214982 | PARGP1        | -1.78 | 1.49E-7  |
| ENSG00000131370 | SH3BP5        | -1.79 | 0.00197  |
| ENSG00000078018 | MAP2          | -1.79 | 8.63E-6  |
| ENSG00000262227 | LOC101927979  | -1.80 | 0.00359  |
| ENSG00000223509 | WHAMMP1       | -1.80 | 1.51E-4  |
| ENSG00000139194 | RBP5          | -1.81 | 0.00363  |
| ENSG00000233122 | CTAGE7P       | -1.81 | 0.00209  |
| ENSG00000152402 | GUCY1A2       | -1.82 | 0.0351   |
| ENSG00000163629 | PTPN13        | -1.83 | 0.0314   |
| ENSG00000169871 | TRIM56        | -1.83 | 0.00127  |
| ENSG00000243789 | JMJD7         | -1.84 | 0.00188  |
| ENSG00000267128 | RNF157-AS1    | -1.84 | 0.00105  |
| ENSG00000128591 | FLNC          | -1.85 | 0.00135  |

|                 |                          |       |         |
|-----------------|--------------------------|-------|---------|
| ENSG00000228672 | PROB1                    | -1.85 | 2.61E-6 |
| ENSG00000225331 | LOC101928576             | -1.86 | 0.0374  |
| ENSG00000226332 | ADRM1                    | -1.87 | 4.99E-4 |
| ENSG00000232063 | LOC100132077             | -1.87 | 4.39E-4 |
| ENSG00000259974 | LINC00261                | -1.87 | 2.69E-4 |
| ENSG00000258366 | RTEL1                    | -1.88 | 0.00318 |
| ENSG00000139908 | TSSK4                    | -1.88 | 0.00219 |
| ENSG00000182646 | FAM156A/FAM156B          | -1.88 | 3.93E-6 |
| ENSG00000186174 | BCL9L                    | -1.88 | 2.05E-6 |
| ENSG00000204659 | CBY3                     | -1.91 | 0.0131  |
| ENSG00000127528 | KLF2                     | -1.91 | 7.7E-10 |
| ENSG00000179240 | LOC100506127             | -1.92 | 5.21E-9 |
| ENSG00000075673 | ATP12A                   | -1.93 | 0.0481  |
| ENSG00000105227 | PRX                      | -1.94 | 2.25E-4 |
| ENSG00000177076 | ACER2                    | -1.95 | 1.41E-5 |
| ENSG00000122861 | PLAU                     | -1.95 | 4.94E-8 |
| ENSG00000234722 | LINC01287                | -1.96 | 0.0478  |
| ENSG00000132405 | TBC1D14                  | -1.96 | 0.00168 |
| ENSG00000180776 | ZDHHC20                  | -1.96 | 0.00114 |
| ENSG00000229422 | LOC100132249             | -1.97 | 1.04E-4 |
| ENSG00000259408 | LOC101929988             | -1.98 | 0.0363  |
| ENSG00000254995 | STX16-NPEPL1             | -1.98 | 1.02E-4 |
| ENSG00000185477 | GPRIN3                   | -2.00 | 1.65E-9 |
| ENSG00000172661 | FAM21A/FAM21C            | -2.01 | 8.69E-5 |
| ENSG00000196622 | RIMBP3 (includes others) | -2.01 | 5.95E-5 |
| ENSG00000146247 | PHIP                     | -2.02 | 5.14E-4 |
| ENSG00000130382 | MLLT1                    | -2.04 | 2.27E-5 |
| ENSG00000215105 | TTC3P1                   | -2.05 | 0.0154  |
| ENSG00000215630 | GUSBP9                   | -2.05 | 2.86E-5 |
| ENSG00000096093 | EFHC1                    | -2.06 | 0.00495 |
| ENSG00000121281 | ADCY7                    | -2.07 | 1.13E-9 |
| ENSG00000258334 | LOC101927267             | -2.10 | 0.0191  |
| ENSG00000213906 | LTB4R2                   | -2.10 | 1.06E-8 |
| ENSG00000185736 | ADARB2                   | -2.11 | 0.0247  |
| ENSG00000106006 | HOXA6                    | -2.12 | 2.55E-5 |
| ENSG00000212232 | SNORD17                  | -2.13 | 0.00662 |
| ENSG00000257315 | ZBED6                    | -2.18 | 0.00222 |
| ENSG00000170500 | LONRF2                   | -2.19 | 0.00543 |
| ENSG00000147145 | LPAR4                    | -2.21 | 0.0278  |
| ENSG00000107282 | APBA1                    | -2.21 | 6.36E-5 |
| ENSG00000235750 | KIAA0040                 | -2.23 | 0.00184 |
| ENSG00000251442 | LINC01094                | -2.24 | 0.00567 |
| ENSG00000076382 | SPAG5                    | -2.24 | 8.0E-6  |
| ENSG00000102837 | OLFM4                    | -2.25 | 0.00265 |
| ENSG00000240303 | ACAD11                   | -2.26 | 0.0043  |
| ENSG00000157110 | BPMS                     | -2.27 | 9.3E-4  |
| ENSG00000229780 | UBE2Q1-AS1               | -2.29 | 0.0257  |
| ENSG00000140848 | CPNE2                    | -2.32 | 0.032   |
| ENSG00000264219 | MIR4442                  | -2.35 | 0.00212 |
| ENSG00000151276 | MAGI1                    | -2.38 | 0.05    |
| ENSG00000173482 | PTPRM                    | -2.43 | 0.00161 |
| ENSG00000246526 | LOC339988                | -2.43 | 2.55E-5 |
| ENSG00000180229 | HERC2P3                  | -2.45 | 0.00137 |
| ENSG00000127588 | GNG13                    | -2.46 | 7.52E-5 |
| ENSG00000257594 | GALNT4                   | -2.46 | 1.51E-8 |
| ENSG00000179104 | TMTC2                    | -2.49 | 0.0153  |
| ENSG00000111796 | KLRB1                    | -2.53 | 0.0345  |
| ENSG00000111664 | GNB3                     | -2.53 | 3.88E-6 |
| ENSG00000145390 | USP53                    | -2.56 | 0.00739 |
| ENSG00000176994 | SMCR8                    | -2.58 | 8.49E-6 |
| ENSG00000215447 | LOC642852                | -2.60 | 0.00174 |
| ENSG00000196535 | MYO18A                   | -2.61 | 4.22E-5 |
| ENSG00000231983 | LINC00415                | -2.62 | 0.00474 |
| ENSG00000188822 | CNR2                     | -2.63 | 0.0114  |
| ENSG00000053438 | NNAT                     | -2.66 | 0.0265  |
| ENSG00000234857 | HNRNPUL2-BSCL2           | -2.70 | 1.19E-6 |
| ENSG00000233539 | LOC730338                | -2.74 | 0.0045  |
| ENSG00000185198 | PRSS57                   | -2.84 | 0.0156  |
| ENSG00000038382 | TRIO                     | -2.84 | 0.0154  |
| ENSG00000164292 | RHOBTB3                  | -3.00 | 0.0492  |
| ENSG00000180878 | C11orf42                 | -3.08 | 0.0499  |

|                 |                           |       |         |
|-----------------|---------------------------|-------|---------|
| ENSG00000158683 | PKD1L1                    | -3.08 | 0.0477  |
| ENSG00000207704 | mir-548                   | -3.08 | 0.043   |
| ENSG00000107719 | PALD1                     | -3.08 | 9.13E-5 |
| ENSG00000187164 | KIAA1598                  | -3.15 | 1.75E-4 |
| ENSG00000005102 | MEOX1                     | -3.16 | 0.0334  |
| ENSG00000257489 | GOLGA2P5                  | -3.17 | 0.00157 |
| ENSG00000149634 | SPATA25                   | -3.21 | 0.0296  |
| ENSG00000171295 | ZNF440                    | -3.27 | 0.0206  |
| ENSG00000001630 | CYP51A1                   | -3.31 | 0.00644 |
| ENSG00000227268 | KLLN                      | -3.39 | 0.0112  |
| ENSG00000117114 | LPHN2                     | -3.39 | 0.00982 |
| ENSG00000184507 | NUTM1                     | -3.43 | 0.0115  |
| ENSG00000209418 | SNORD64                   | -3.43 | 0.00951 |
| ENSG00000145908 | ZNF300                    | -3.45 | 0.0111  |
| ENSG00000236529 | DKFZP434F142              | -3.56 | 0.00623 |
| ENSG00000132563 | REEP2                     | -3.79 | 0.0461  |
| ENSG00000266235 | MIR3176                   | -3.81 | 4.92E-5 |
| ENSG00000074211 | PPP2R2C                   | -3.89 | 5.42E-4 |
| ENSG00000064835 | POU1F1                    | -4.05 | 0.0193  |
| ENSG00000177675 | CD163L1                   | -4.28 | 0.0306  |
| ENSG00000155016 | CYP2U1                    | -4.5  | 0.0199  |
| ENSG00000082397 | EPB41L3                   | -4.52 | 1.55E-4 |
| ENSG00000180071 | ANKRD18A                  | -4.69 | 0.00625 |
| ENSG00000151208 | DLG5                      | -4.78 | 0.0244  |
| ENSG00000179604 | CDC42EP4                  | -5.13 | 0.0379  |
| ENSG00000232850 | PTGES2-AS1                | -5.13 | 0.0327  |
| ENSG00000077420 | APBB1IP                   | -5.15 | 0.00745 |
| ENSG00000149021 | SCGB1A1                   | -5.24 | 0.0358  |
| ENSG00000242808 | SOX2-OT                   | -5.36 | 0.0283  |
| ENSG00000260750 | LOC101928737              | -5.43 | 0.017   |
| ENSG00000105501 | SIGLEC5                   | -5.48 | 0.032   |
| ENSG00000233968 | LOC101928834              | -5.56 | 0.0329  |
| ENSG00000122707 | RECK                      | -5.6  | 0.0384  |
| ENSG00000239552 | HOXB-AS2                  | -5.88 | 0.00105 |
| ENSG00000128815 | WDFY4                     | -5.94 | 0.00963 |
| ENSG00000206952 | SNORA76A                  | -6.00 | 3.32E-4 |
| ENSG00000125810 | CD93                      | -6.11 | 0.00604 |
| ENSG00000151729 | SLC25A4                   | -6.34 | 0.0311  |
| ENSG00000221866 | PLXNA4                    | -6.92 | 0.0317  |
| ENSG00000246363 | LOC728084                 | -7.11 | 0.0106  |
| ENSG00000105492 | SIGLEC6                   | -7.14 | 0.0279  |
| ENSG00000198417 | MT1F                      | -7.45 | 0.0244  |
| ENSG00000116191 | RALGPS2                   | -7.66 | 0.0215  |
| ENSG00000173372 | C1QA                      | -7.77 | 0.0206  |
| ENSG00000176273 | SLC35G1                   | -7.90 | 0.019   |
| ENSG00000172179 | PRL                       | -7.93 | 0.019   |
| ENSG00000175893 | ZDHHC21                   | -8.03 | 0.0177  |
| ENSG00000137573 | SULF1                     | -8.32 | 0.00373 |
| ENSG00000170085 | SIMC1                     | -8.75 | 0.00945 |
| ENSG00000120008 | WDR11                     | -8.91 | 5.91E-4 |
| ENSG00000146950 | SHROOM2                   | -10.7 | 0.00687 |
| ENSG00000221957 | KIR2DS4 (includes others) | -11.3 | 0.00629 |
| ENSG00000125498 | KIR2DL1/KIR2DL3           | -12.4 | 0.00784 |

*Common genes for KIR2DS1\_4h and NKG2D\_4h stimulation:*

| Ensembl ID      | Gene symbol                 | Fold change<br>(KIR2DS1_4h) | p-value<br>(KIR2DS1_4h) | Fold change<br>(NKG2D_4h) | p-value<br>(NKG2D_4h) |
|-----------------|-----------------------------|-----------------------------|-------------------------|---------------------------|-----------------------|
| ENSG00000179388 | EGR3 (transcription factor) | 3.94                        | 2.66E-20                | 3.01                      | 0.0000000675          |
| ENSG00000114423 | CBLB (E3 ubiquitin ligase)  | 2.14                        | 5.06E-36                | 1.93                      | 1.15E-43              |
| ENSG00000140199 | SLC12A6 (K-Cl transporter)  | 1.90                        | 4.2E-14                 | 2.13                      | 3.15E-31              |
| ENSG00000102908 | NFAT5                       | 1.88                        | 2.64E-86                | 1.66                      | 1.35E-59              |
| ENSG00000109320 | NFKB1                       | 1.81                        | 4.12E-71                | 1.51                      | 5.33E-67              |
| ENSG00000153094 | BCL2L11                     | 1.76                        | 6.5E-6                  | 1.53                      | 6.46E-7               |
| ENSG00000135048 | TMEM2                       | 1.72                        | 1.95E-29                | 1.51                      | 8.15E-36              |
| ENSG00000235724 | LOC101929512                | 1.68                        | 0.00232                 | 1.58                      | 0.000485              |
| ENSG00000226312 | CFLAR-AS1                   | 1.56                        | 0.0249                  | 1.53                      | 0.00648               |

*Common genes for KIR2DS1\_4h and Ly49H\_4h stimulation:*

| Ensembl ID      | Gene symbol | Fold change<br>(KIR2DS1_4h) | p-value<br>(KIR2DS1_4h) | Fold change<br>(Ly49H_4h) | p-value<br>(Ly49H_4h) |
|-----------------|-------------|-----------------------------|-------------------------|---------------------------|-----------------------|
| ENSG00000204671 | IL31        | 5.13                        | 0.00468                 | 7.65                      | 2.02E-19              |

|                 |                           |       |          |       |          |
|-----------------|---------------------------|-------|----------|-------|----------|
| ENSG00000164399 | IL3                       | 3.92  | 8.91E-6  | 6.76  | 1.27E-29 |
| ENSG00000006074 | CCL18                     | 3.62  | 0.00479  | 3.73  | 0.000837 |
| ENSG00000233791 | LINC01136                 | 2.39  | 0.0191   | 3.30  | 1.54E-5  |
| ENSG00000249241 | LOC101060498              | 2.28  | 0.0129   | 2.42  | 0.00274  |
| ENSG00000171552 | BCL2L1                    | 2.10  | 7.79E-94 | 1.56  | 2.41E-26 |
| ENSG00000222009 | BTBD19                    | 2.03  | 3.13E-4  | 2.78  | 2.11E-11 |
| ENSG00000067208 | EVI5                      | 1.84  | 4.78E-30 | 2.51  | 1.31E-46 |
| ENSG00000109787 | KLF3                      | 1.83  | 1.44E-4  | 2.13  | 2.49E-5  |
| ENSG00000253522 | mir-146                   | 1.83  | 5.6E-11  | 1.57  | 1.09E-6  |
| ENSG00000215417 | MIR17HG                   | 1.83  | 6.21E-21 | 1.86  | 5.45E-19 |
| ENSG00000104783 | KCNN4                     | 1.80  | 8.4E-48  | 1.75  | 8.91E-21 |
| ENSG00000146232 | NFKBIE                    | 1.80  | 3.65E-66 | 2.46  | 2.56E-61 |
| ENSG00000101849 | TBL1X                     | 1.80  | 7.18E-4  | -5.33 | 0.0353   |
| ENSG00000182687 | GALR2                     | 1.77  | 0.0262   | 2.17  | 0.00428  |
| ENSG00000155974 | GRIP1                     | 1.77  | 0.0204   | 2.83  | 3.12E-7  |
| ENSG00000144802 | NFKBIZ                    | 1.77  | 4.37E-20 | 1.91  | 2.19E-19 |
| ENSG00000213443 | CLEC2D                    | 1.71  | 1.88E-39 | 2.01  | 4.3E-22  |
| ENSG00000186594 | MIR22HG                   | 1.71  | 1.14E-17 | 2.84  | 8.85E-49 |
| ENSG00000069399 | BCL3                      | 1.68  | 1.17E-50 | 2.25  | 3.48E-45 |
| ENSG00000162783 | IER5                      | 1.67  | 5.59E-19 | 1.72  | 2.46E-10 |
| ENSG00000179294 | C17orf96                  | 1.66  | 6.36E-34 | 1.81  | 1.01E-21 |
| ENSG00000145779 | TNFAIP8                   | 1.66  | 1.26E-60 | 1.90  | 1.3E-33  |
| ENSG00000099860 | GADD45B                   | 1.65  | 2.12E-35 | 1.59  | 8.93E-22 |
| ENSG00000008405 | CRY1                      | 1.62  | 9.82E-50 | 1.78  | 1.66E-34 |
| ENSG00000120278 | PLEKHG1                   | 1.62  | 0.0342   | 1.95  | 0.00539  |
| ENSG00000264577 | SNORD4A                   | 1.60  | 0.00608  | 1.95  | 1.02E-4  |
| ENSG00000256594 | LOC374443                 | 1.58  | 7.3E-25  | 1.89  | 1.16E-26 |
| ENSG00000165997 | ARL5B                     | 1.57  | 8.75E-48 | 2.09  | 8.7E-55  |
| ENSG00000174749 | C4orf32                   | 1.57  | 1.17E-44 | 1.81  | 3.4E-31  |
| ENSG00000138166 | DUSP5                     | 1.56  | 1.35E-13 | 1.83  | 2.29E-14 |
| ENSG00000006327 | TNFRSF12A                 | 1.56  | 3.85E-14 | 1.69  | 3.68E-14 |
| ENSG00000117560 | FASLG                     | 1.55  | 8.29E-21 | 2.10  | 4.14E-30 |
| ENSG00000095794 | CREM                      | 1.52  | 2.23E-27 | 2.00  | 5.31E-22 |
| ENSG00000215244 | LOC399715                 | 1.52  | 0.0332   | 2.09  | 6.52E-5  |
| ENSG00000087074 | PPP1R15A                  | 1.52  | 6.43E-11 | 1.61  | 7.04E-10 |
| ENSG00000118515 | SGK1                      | 1.52  | 4.46E-13 | 2.85  | 6.92E-44 |
| ENSG00000125733 | TRIP10                    | 1.51  | 3.26E-46 | 1.71  | 4.26E-29 |
| ENSG00000121807 | CCR2                      | -1.56 | 3.28E-35 | -2.12 | 4.83E-26 |
| ENSG00000241978 | AKAP2                     | -1.57 | 0.00476  | -3.41 | 2.28E-8  |
| ENSG00000140836 | ZFHX3                     | -1.57 | 0.0105   | -1.74 | 0.00618  |
| ENSG00000172349 | IL16                      | -1.62 | 2.88E-5  | -1.52 | 5.03E-4  |
| ENSG00000213626 | LBH                       | -1.62 | 9.31E-11 | -1.60 | 4.47E-6  |
| ENSG00000164855 | TMEM184A                  | -1.62 | 5.11E-4  | -2.19 | 0.0123   |
| ENSG00000261064 | LOC100996255              | -1.67 | 0.033    | -4.06 | 1.22E-5  |
| ENSG00000262312 | LOC101929732              | -1.82 | 3.14E-4  | -4.53 | 1.58E-11 |
| ENSG00000211696 | TRGV8                     | -1.82 | 7.78E-5  | -1.53 | 0.00124  |
| ENSG00000235172 | LINC01366                 | -1.83 | 1.69E-7  | -1.67 | 5.34E-5  |
| ENSG00000188626 | GOLGA8J (includes others) | -1.86 | 3.69E-4  | -5.43 | 0.0116   |
| ENSG00000091831 | ESR1                      | -2.14 | 0.00287  | -3.14 | 5.88E-5  |
| ENSG00000226650 | KIF4B                     | -2.27 | 5.66E-5  | -2.35 | 1.38E-4  |

Common genes for Ly49H\_4h and NKG2D\_4h stimulation:

| Ensembl ID      | Gene symbol  | Fold change<br>(Ly49H_4h) | p-value<br>(Ly49H_4h) | Fold change<br>(NKG2D_4h) | p-value<br>(NKG2D_4h) |
|-----------------|--------------|---------------------------|-----------------------|---------------------------|-----------------------|
| ENSG00000112115 | IL17A        | 6.49                      | 4.39E-10              | 5.47                      | 9.0E-6                |
| ENSG00000122641 | INHBA        | 6.34                      | 3.96E-67              | 1.88                      | 0.0172                |
| ENSG00000117009 | KMO          | 5.93                      | 1.38E-16              | 3.12                      | 0.00839               |
| ENSG00000146216 | TTBK1        | 4.94                      | 0.00442               | 5.57                      | 6.14E-5               |
| ENSG00000130202 | PVRL2        | 4.17                      | 2.75E-34              | 2.50                      | 1.12E-6               |
| ENSG00000177494 | ZBED2        | 3.03                      | 6.92E-26              | 1.95                      | 4.84E-9               |
| ENSG00000236700 | LINC01010    | 2.92                      | 0.00985               | 2.43                      | 0.042                 |
| ENSG00000173077 | Dec-1        | 2.65                      | 1.41E-26              | 1.57                      | 1.12E-5               |
| ENSG00000167772 | ANGPTL4      | 2.43                      | 0.00289               | 1.90                      | 0.0341                |
| ENSG00000197208 | SLC22A4      | 2.31                      | 0.00449               | 1.86                      | 0.0145                |
| ENSG00000231346 | LINC01160    | 2.25                      | 7.22E-17              | 1.91                      | 3.08E-18              |
| ENSG00000240240 | LOC101060026 | 2.22                      | 1.55E-4               | 1.60                      | 0.0058                |

Common genes for KIR2DS1\_4h, Ly49H\_4h, and NKG2D\_4h stimulation:

| Ensembl ID      | Gene symbol | Fold change<br>(KIR2DS1_4h) | p-value<br>(KIR2DS1_4h) | Fold change<br>(Ly49H_4h) | p-value<br>(Ly49H_4h) | Fold change<br>(NKG2D_4h) | p-value<br>(NKG2D_4h) |
|-----------------|-------------|-----------------------------|-------------------------|---------------------------|-----------------------|---------------------------|-----------------------|
| ENSG00000168334 | XIRP1       | 9.99                        | 7.94E-66                | 12.30                     | 1.61E-152             | 9.66                      | 8.94E-95              |

|                 |               |      |           |       |           |      |           |
|-----------------|---------------|------|-----------|-------|-----------|------|-----------|
| ENSG00000138684 | IL21          | 8.40 | 1.53E-24  | 7.25  | 6.47E-17  | 6.60 | 1.62E-11  |
| ENSG00000109943 | CRTAM         | 8.16 | 2.17E-151 | 10.40 | 1.79E-252 | 8.13 | 2.09E-136 |
| ENSG00000129277 | CCL4          | 8.04 | 7.84E-199 | 10.00 | 1.25E-145 | 7.74 | 1.18E-228 |
| ENSG00000169429 | CXCL8         | 7.98 | 1.16E-263 | 10.50 | 3.07E-259 | 6.78 | 8.15E-281 |
| ENSG00000108702 | CCL1          | 7.90 | 3.16E-42  | 7.52  | 3.87E-89  | 6.80 | 1.27E-23  |
| ENSG00000197262 | CCL4L1/CCL4L2 | 7.65 | 4.13E-23  | 10.10 | 4.69E-84  | 6.78 | 3.67E-15  |
| ENSG00000164400 | CSF2          | 7.53 | 5.41E-148 | 10.30 | 5.73E-243 | 5.86 | 5.58E-32  |
| ENSG00000006075 | CCL3          | 7.50 | 5.11E-239 | 9.63  | 5.18E-198 | 7.07 | 4.18E-252 |
| ENSG00000205021 | CCL3L1        | 7.41 | 2.02E-42  | 10.60 | 2.52E-91  | 5.19 | 2.57E-12  |
| ENSG00000128342 | LIF           | 7.24 | 1.65E-235 | 9.06  | 1.83E-293 | 6.63 | 7.41E-210 |
| ENSG00000109471 | IL2           | 7.03 | 1.79E-49  | 11.50 | 1.02E-86  | 5.22 | 2.75E-19  |
| ENSG00000111537 | IFNG          | 6.48 | 0.00      | 8.89  | 8E-305    | 5.81 | 0.00      |
| ENSG00000232810 | TNF           | 6.44 | 8.57E-74  | 8.97  | 3.92E-162 | 5.57 | 3.08E-44  |
| ENSG00000135625 | EGR4          | 6.28 | 7.5E-284  | 6.07  | 5.25E-169 | 5.49 | 7.41E-210 |
| ENSG00000124145 | SDC4          | 5.69 | 1.28E-51  | 6.35  | 1.68E-75  | 5.05 | 2.39E-37  |
| ENSG00000050730 | TNIP3         | 5.58 | 4.31E-220 | 5.47  | 3.24E-133 | 5.44 | 3.84E-193 |
| ENSG00000125740 | FOSB          | 5.53 | 4.63E-262 | 5.52  | 1.02E-101 | 4.86 | 5.58E-258 |
| ENSG00000143184 | XCL1          | 5.52 | 9.47E-248 | 7.78  | 5.34E-203 | 5.39 | 2.02E-195 |
| ENSG00000170345 | FOS           | 5.45 | 5.05E-177 | 5.51  | 8.39E-126 | 4.68 | 9.51E-77  |
| ENSG00000115598 | IL1RL2        | 5.32 | 6.65E-4   | 4.95  | 0.0047    | 4.88 | 6.82E-4   |
| ENSG00000227145 | IL21-AS1      | 5.32 | 6.83E-4   | 6.55  | 1.41E-10  | 5.81 | 2.82E-8   |
| ENSG00000108691 | CCL2          | 5.16 | 1.44E-84  | 5.32  | 3.64E-106 | 4.06 | 1.05E-29  |
| ENSG00000119508 | NR4A3         | 4.93 | 1.03E-70  | 5.48  | 8.42E-79  | 4.56 | 3.79E-80  |
| ENSG00000120738 | EGR1          | 4.88 | 1.07E-195 | 4.99  | 4.05E-122 | 4.20 | 8.98E-88  |
| ENSG00000122877 | EGR2          | 4.81 | 5.34E-99  | 5.10  | 1.4E-90   | 4.41 | 2.68E-101 |
| ENSG00000145839 | IL9           | 4.51 | 1.3E-8    | 6.66  | 4.01E-28  | 3.08 | 0.00112   |
| ENSG00000143185 | XCL2          | 4.42 | 2.57E-8   | 3.97  | 3.58E-6   | 3.43 | 4.99E-5   |
| ENSG00000049249 | TNFRSF9       | 4.33 | 1.7E-57   | 3.69  | 5.01E-33  | 4.10 | 4.32E-53  |
| ENSG00000167874 | TMEM88        | 4.19 | 2.18E-17  | 6.78  | 6.81E-49  | 3.64 | 3.88E-17  |
| ENSG00000106366 | SERPINE1      | 4.14 | 8.77E-15  | 4.78  | 3.33E-23  | 2.98 | 2.97E-7   |
| ENSG00000123358 | NR4A1         | 4.06 | 7.35E-158 | 4.25  | 2.05E-104 | 3.63 | 6.25E-131 |
| ENSG00000134668 | SPOCD1        | 4.01 | 1.86E-6   | 4.39  | 1.49E-8   | 3.45 | 1.37E-5   |
| ENSG00000236453 | LOC102723946  | 3.96 | 2.9E-13   | 4.66  | 6.67E-23  | 3.13 | 7.2E-10   |
| ENSG00000109321 | AREG          | 3.95 | 1.32E-33  | 5.50  | 8.33E-83  | 3.79 | 6.1E-37   |
| ENSG00000162692 | VCAM1         | 3.95 | 5.4E-37   | 2.43  | 4.53E-8   | 2.78 | 2.68E-19  |
| ENSG00000143333 | RGS16         | 3.86 | 3.1E-6    | 3.41  | 1.11E-5   | 3.44 | 8.06E-7   |
| ENSG00000132510 | KDM6B         | 3.78 | 8.28E-171 | 3.87  | 4.81E-107 | 3.50 | 8.18E-162 |
| ENSG00000118503 | TNFAIP3       | 3.77 | 4.8E-56   | 4.06  | 1.24E-54  | 3.51 | 2.26E-53  |
| ENSG00000256515 | CCL3L3        | 3.75 | 0.0409    | 8.03  | 1.25E-31  | 3.46 | 0.0162    |
| ENSG00000140379 | BCL2A1        | 3.73 | 1.18E-139 | 4.95  | 8E-103    | 3.29 | 5.75E-107 |
| ENSG00000185022 | MAFF          | 3.69 | 2.31E-86  | 4.64  | 5.21E-99  | 3.19 | 7.58E-92  |
| ENSG00000136367 | ZFHX2         | 3.62 | 8.15E-45  | 3.17  | 1.85E-25  | 3.36 | 1.29E-45  |
| ENSG00000125730 | C3            | 3.58 | 2.79E-15  | 3.68  | 1.64E-14  | 2.96 | 6.95E-13  |
| ENSG00000144655 | CSRNP1        | 3.57 | 1.23E-186 | 4.62  | 8.26E-104 | 3.10 | 7E-201    |
| ENSG00000184545 | DUSP8         | 3.57 | 4.81E-13  | 3.95  | 4.99E-17  | 3.43 | 1.06E-16  |
| ENSG00000166592 | RRAD          | 3.48 | 1.46E-11  | 4.71  | 1.73E-21  | 2.39 | 7.98E-5   |
| ENSG00000056558 | TRAF1         | 3.4  | 9.46E-152 | 3.79  | 5.73E-119 | 3.02 | 5.64E-110 |
| ENSG00000100906 | NFKBIA        | 3.38 | 6.38E-61  | 4.09  | 1.5E-75   | 2.64 | 2.73E-52  |
| ENSG00000197461 | PDGFA         | 3.38 | 9.49E-45  | 3.32  | 1.36E-35  | 2.76 | 1.98E-43  |
| ENSG00000167604 | NFKBID        | 3.35 | 6.64E-225 | 4.31  | 4.48E-82  | 2.68 | 1.07E-215 |
| ENSG00000230533 | LOC102723649  | 3.31 | 2.27E-6   | 4.96  | 7.22E-17  | 2.74 | 3.33E-4   |
| ENSG00000153234 | NR4A2         | 3.29 | 8.7E-76   | 4.01  | 4.78E-93  | 3.05 | 4.33E-46  |
| ENSG00000234883 | MIR155HG      | 3.27 | 3.23E-27  | 4.25  | 1.12E-43  | 2.48 | 2.82E-20  |
| ENSG00000199568 | RNU5A-1       | 3.27 | 5.2E-16   | 4.10  | 2.76E-29  | 2.57 | 5.59E-6   |
| ENSG00000090339 | ICAM1         | 3.23 | 2.27E-107 | 3.38  | 2.03E-65  | 2.46 | 7.89E-74  |
| ENSG00000166920 | C15orf48      | 3.18 | 0.00549   | 4.12  | 4.68E-7   | 2.76 | 0.0182    |
| ENSG00000121101 | TEX14         | 3.12 | 2.91E-27  | 3.91  | 3.04E-42  | 2.48 | 6.47E-20  |
| ENSG00000187556 | NANOS3        | 3.09 | 0.00217   | 3.04  | 0.00442   | 2.43 | 0.0353    |
| ENSG00000023445 | BIRC3         | 3.05 | 2.2E-56   | 2.88  | 2.36E-38  | 2.70 | 3.64E-63  |
| ENSG00000125657 | TNFSF9        | 3.05 | 3.94E-6   | 6.03  | 4.89E-58  | 3.26 | 1.78E-10  |
| ENSG00000120217 | CD274         | 2.99 | 8.16E-47  | 3.38  | 2.19E-38  | 2.70 | 1.35E-52  |
| ENSG00000108924 | HLF           | 2.97 | 6.52E-22  | 3.78  | 1.48E-35  | 2.44 | 5.66E-20  |
| ENSG00000105835 | NAMPT         | 2.92 | 1.68E-198 | 3.28  | 1.61E-130 | 2.56 | 4.86E-176 |
| ENSG00000131669 | NINJ1         | 2.87 | 2.16E-88  | 3.56  | 4.3E-59   | 2.29 | 2.7E-68   |
| ENSG00000159388 | BTG2          | 2.84 | 1.17E-61  | 3.80  | 8.46E-70  | 2.40 | 3.11E-63  |
| ENSG00000105246 | EBI3          | 2.79 | 2.31E-9   | 2.63  | 8.46E-10  | 1.93 | 5.91E-7   |
| ENSG00000170542 | SERPINB9      | 2.78 | 1.38E-110 | 3.20  | 3.64E-106 | 2.58 | 2.11E-98  |
| ENSG00000172738 | TMEM217       | 2.77 | 1.49E-47  | 3.40  | 5.77E-47  | 2.36 | 2.74E-39  |
| ENSG00000166886 | NAB2          | 2.72 | 2.18E-148 | 1.54  | 8.12E-10  | 2.48 | 6.83E-126 |
| ENSG00000100453 | GZMB          | 2.68 | 5.33E-45  | 4.65  | 1.84E-65  | 2.85 | 1.35E-60  |
| ENSG00000134030 | CTIF          | 2.67 | 6.34E-5   | 2.87  | 7.89E-6   | 2.26 | 4.56E-5   |

|                 |              |      |           |      |          |      |           |
|-----------------|--------------|------|-----------|------|----------|------|-----------|
| ENSG00000177606 | JUN          | 2.67 | 4.03E-33  | 2.13 | 1.45E-15 | 1.91 | 1.54E-23  |
| ENSG00000240057 | LOC102724287 | 2.61 | 5.8E-6    | 1.99 | 0.0146   | 1.82 | 0.00518   |
| ENSG00000164287 | CDC20B       | 2.59 | 8.32E-9   | 3.25 | 3.7E-16  | 1.81 | 1.18E-4   |
| ENSG00000114473 | IQCG         | 2.58 | 3.73E-90  | 3.02 | 2.03E-67 | 2.13 | 4.52E-87  |
| ENSG00000173334 | TRIB1        | 2.58 | 6.66E-21  | 2.86 | 3.11E-24 | 2.18 | 1.98E-20  |
| ENSG00000104951 | IL4I1        | 2.57 | 5.02E-14  | 3.32 | 2.75E-23 | 2.34 | 1.04E-11  |
| ENSG00000168389 | MFSD2A       | 2.56 | 1.61E-148 | 2.69 | 3.04E-75 | 2.12 | 4.46E-97  |
| ENSG00000104856 | RELB         | 2.47 | 2.88E-20  | 2.86 | 8.33E-24 | 2.11 | 9.54E-22  |
| ENSG00000162772 | ATF3         | 2.45 | 1.09E-63  | 3.14 | 4.39E-91 | 1.91 | 9.91E-71  |
| ENSG00000184557 | SOCS3        | 2.45 | 1.29E-44  | 3.22 | 6.23E-68 | 1.89 | 1.16E-32  |
| ENSG00000180209 | MYLPF        | 2.44 | 9.64E-4   | 2.74 | 7.78E-4  | 1.75 | 0.0356    |
| ENSG00000110848 | CD69         | 2.43 | 8.04E-40  | 3.14 | 6.18E-54 | 2.00 | 1.18E-44  |
| ENSG00000174946 | GPR171       | 2.43 | 9.87E-29  | 2.34 | 1.71E-24 | 2.05 | 3.68E-24  |
| ENSG00000149289 | ZC3H12C      | 2.43 | 2.89E-106 | 2.99 | 8.42E-79 | 2.26 | 5.24E-102 |
| ENSG00000137331 | IER3         | 2.39 | 1.68E-62  | 3.60 | 2.7E-59  | 1.75 | 1.31E-40  |
| ENSG00000207870 | mir-221      | 2.39 | 1.54E-8   | 2.99 | 2.68E-16 | 1.78 | 1.22E-6   |
| ENSG00000162924 | REL          | 2.38 | 4.57E-44  | 1.54 | 3.85E-6  | 2.63 | 4.14E-46  |
| ENSG00000171604 | CXXC5        | 2.36 | 1.08E-12  | 2.18 | 2.9E-14  | 1.87 | 5.72E-12  |
| ENSG00000171223 | JUNB         | 2.33 | 2.2E-113  | 2.76 | 3.92E-87 | 1.86 | 4.21E-98  |
| ENSG00000112149 | CD83         | 2.30 | 5.44E-54  | 2.89 | 4.99E-62 | 1.99 | 1.53E-56  |
| ENSG00000160606 | TLCD1        | 2.29 | 5.71E-44  | 2.94 | 7.12E-23 | 1.76 | 1.16E-32  |
| ENSG00000267534 | S1PR2        | 2.27 | 1.24E-43  | 2.86 | 8.17E-36 | 1.83 | 6.79E-19  |
| ENSG00000007866 | TEAD3        | 2.27 | 2.84E-9   | 2.62 | 2.7E-12  | 2.41 | 3.28E-10  |
| ENSG00000197019 | SERTAD1      | 2.26 | 7.08E-70  | 3.18 | 5.72E-38 | 1.82 | 1.24E-57  |
| ENSG00000155090 | KLF10        | 2.23 | 2.31E-60  | 1.68 | 1.2E-16  | 1.71 | 7.92E-58  |
| ENSG00000221887 | HMSD         | 2.19 | 8.3E-14   | 2.88 | 3.64E-26 | 1.91 | 1.69E-10  |
| ENSG00000198355 | PIM3         | 2.16 | 1.85E-98  | 2.49 | 8.99E-76 | 1.72 | 2.1E-90   |
| ENSG00000124762 | CDKN1A       | 2.14 | 2.05E-24  | 3.64 | 9.13E-75 | 1.91 | 6.49E-19  |
| ENSG00000011590 | ZBTB32       | 2.14 | 4.02E-83  | 2.28 | 7.23E-29 | 1.78 | 2.79E-48  |
| ENSG00000226380 | mir-29       | 2.11 | 6.17E-23  | 3.57 | 2.07E-46 | 1.94 | 3.94E-29  |
| ENSG00000169398 | PTK2         | 2.09 | 9.5E-6    | 2.16 | 7.26E-5  | 1.62 | 7.68E-5   |
| ENSG00000123146 | CD97         | 2.06 | 1.38E-109 | 1.85 | 6.38E-34 | 1.61 | 1.54E-71  |
| ENSG00000119772 | DNMT3A       | 2.06 | 6.1E-13   | 1.86 | 6.83E-8  | 1.70 | 8.91E-10  |
| ENSG00000161570 | CCL5         | 2.05 | 1.98E-41  | 3.06 | 3.3E-53  | 1.83 | 1.42E-36  |
| ENSG00000088899 | LZTS3        | 2.03 | 5.87E-36  | 1.63 | 1.64E-14 | 1.57 | 2.23E-19  |
| ENSG00000095637 | SORBS1       | 2.03 | 5.07E-14  | 2.17 | 3.09E-9  | 2.00 | 4.35E-12  |
| ENSG00000185650 | ZFP36L1      | 2.03 | 9.79E-63  | 2.87 | 9.85E-53 | 1.73 | 2.83E-35  |
| ENSG00000023902 | PLEKHO1      | 2.02 | 2.42E-5   | 1.95 | 0.00185  | 1.56 | 2.95E-4   |
| ENSG00000175183 | CSRP2        | 1.99 | 0.0313    | 2.03 | 0.0231   | 1.74 | 0.0212    |
| ENSG00000136052 | SLC41A2      | 1.99 | 4.88E-33  | 2.14 | 1.64E-29 | 1.60 | 1.54E-28  |
| ENSG00000117586 | TNFSF4       | 1.99 | 2.15E-86  | 1.88 | 1.04E-40 | 1.61 | 7.83E-71  |
| ENSG00000077150 | NFKB2        | 1.98 | 1.63E-19  | 2.38 | 9.86E-21 | 1.82 | 2.76E-24  |
| ENSG00000137502 | RAB30        | 1.97 | 2.64E-50  | 1.73 | 5.69E-21 | 1.69 | 1.34E-36  |
| ENSG00000136244 | IL6          | 1.93 | 0.00177   | 4.30 | 4.24E-37 | 1.66 | 0.000627  |
| ENSG00000125735 | TNFSF14      | 1.92 | 1.52E-62  | 2.27 | 2.99E-28 | 1.51 | 1.06E-38  |
| ENSG00000003402 | CFLAR        | 1.90 | 1.5E-86   | 2.06 | 9.03E-40 | 1.75 | 9.6E-79   |
| ENSG00000231507 | LINC01353    | 1.90 | 8.01E-8   | 3.07 | 1.49E-24 | 1.86 | 7.01E-11  |
| ENSG00000173166 | RAPH1        | 1.90 | 1.56E-7   | 2.61 | 1.79E-11 | 1.77 | 2.96E-8   |
| ENSG00000163874 | ZC3H12A      | 1.89 | 1.78E-39  | 2.07 | 2.52E-36 | 1.52 | 8.15E-43  |
| ENSG00000126561 | STAT5A       | 1.88 | 2.52E-69  | 1.82 | 1.82E-29 | 1.55 | 1.06E-34  |
| ENSG00000075426 | FOSL2        | 1.87 | 5.96E-28  | 2.09 | 2.2E-25  | 1.78 | 3.07E-39  |
| ENSG00000150977 | RILPL2       | 1.87 | 3.24E-70  | 1.55 | 6.75E-23 | 1.57 | 1.59E-63  |
| ENSG00000253210 | LOC101927963 | 1.81 | 3.79E-21  | 3.5  | 1.5E-54  | 2.05 | 2.34E-33  |
| ENSG00000076604 | TRAF4        | 1.81 | 1.92E-52  | 1.99 | 1.06E-41 | 1.52 | 5.4E-46   |
| ENSG00000143669 | LYST         | 1.79 | 1.16E-39  | 1.63 | 4.11E-20 | 1.82 | 3.13E-44  |
| ENSG00000130449 | ZSWIM6       | 1.79 | 3.22E-56  | 1.66 | 6.15E-20 | 1.66 | 1.39E-77  |
| ENSG00000197329 | PELI1        | 1.73 | 1.22E-78  | 1.89 | 2.09E-36 | 1.53 | 7.36E-83  |
| ENSG00000171174 | RBKS         | 1.68 | 1.52E-4   | 2.64 | 4.98E-16 | 1.89 | 1.02E-14  |
| ENSG00000140564 | FURIN        | 1.66 | 1.79E-7   | 1.66 | 1.02E-6  | 1.60 | 4.36E-8   |
| ENSG00000166455 | C16orf46     | 1.50 | 8.56E-5   | 1.77 | 2.18E-6  | 1.83 | 6.37E-13  |
| ENSG00000090104 | RGS1         | 1.50 | 3.69E-35  | 2.50 | 4.57E-41 | 1.53 | 5.3E-33   |
